# Supplementary material for: Adaptive prospective optical gating enables day-long 3D time-lapse imaging of the beating embryonic zebrafish heart
Source: PubMed Central journal article supplement (PMC6858381; doi:10.1038/s41467-019-13112-6), 2019-11-15
Supplement: 41467_2019_13112_MOESM3_ESM.pdf [file 41467_2019_13112_MOESM3_ESM.pdf]

## Description of Additional Supplementary Files

Supplementary **Movie 1: Optical gating concept.** The constant motion of the beating heart presents a challenge for imaging (grey representation of part of the heart ventricle). Light sheet fluorescence microscopy provides optical sectioning to image a single plane of the heart at a time (depicted in green), without any superfluous illumination in other spatial locations. However, retrospective optical gating techniques require many raw fluorescence video images to be acquired at *every*  $z$  plane in the heart; a consistent  $z$  stack at a fixed cardiac phase is reconstructed following subsequent computer analysis. In contrast, prospective optical gating ensures that the heart is only exposed to potentially-harmful laser light at the required *time* in the cardiac cycle.

Supplementary **Movie 2: Prospective optical gating fails to maintain phase-lock over extended periods.** Due to changes in brightfield features, prospective optical gating loses phase-lock with time (left) whilst adaptive prospective optical gating is able to maintain a lock (right) over many hours. The colours indicate the difference in phase between the frame shown and the mean human-scored target frame (c.f. Figure 3). Scale bar:  $30\mu\text{m}$ .

Supplementary **Movie 3: Diagrammatic representation of adaptive prospective optical gating.** For each time-lapse point, a new reference heartbeat is determined in the brightfield images. This new reference heartbeat could be used to create a 3D stack using prospective optical gating; however, the new reference heartbeat is not aligned with previous reference sequences (blue). By incorporating retrospective optical gating on these brightfield reference heartbeats, including motion correction and a weighted regression with historical reference sequences, the previous target can be identified in each new reference sequence. This allows phase-locking between stacks throughout a time-lapse experiment (right).

Supplementary **Movie 4: Phase-locked, day-long cardiac time-lapse imaging of cardiac morphogenesis.** Phase-locked, live time lapse imaging of heart development (48 to 72 hours post-fertilization (hpf), at 300s intervals) showing endothelium lining blood vessels and heart chambers (transgene *flk1:mCherry*). Movie shows maximum intensity projections of  $z$ -stacks. Scale bar:  $30\mu\text{m}$ .

Supplementary **Movie 5: Phase-locked, day-long cardiac time-lapse imaging of cardiac morphogenesis.** Phase-locked, live time lapse imaging of heart development (48 to 72 hours post-fertilization (hpf), at 300s intervals) showing endothelium lining blood vessels and heart chambers (transgene *flk1:mCherry*). Movie shows 3D rendering of heart chambers. Scale bar:  $30\mu\text{m}$ .

**Supplementary Movie 6: Sustained beating-heart time-lapse imaging of immune cell responses to cardiac injury.** Synchronized time-lapse 3D imaging of macrophage immune cells migrating to the site of laser-injury in zebrafish heart showing intensive macrophage activity at the wound site. Maximum intensity projection of  $z$ -stacks, showing macrophages (magenta - transgene *mpeg:mCherry*) at the injury site on cardiomyocytes (green - transgene *myl7:GFP*). Injury occurred at 72 hpf, with imaging commencing one hour after injury; note that the effect of laser injury on heart rhythm posed challenges for the synchronization, resulting in some planes and/or timepoints with poor synchronization. Scale bar:  $30\mu\text{m}$ , Timestamps: hours post-injury.

**Supplementary Movie 7: Sustained beating-heart time-lapse imaging of immune cell responses to cardiac injury.** Synchronized time-lapse 3D imaging of macrophage immune cells migrating to the site of laser-injury in zebrafish heart, showing macrophage activity and shape changes at the wound site. Maximum intensity projection of  $z$ -stacks, showing macrophages (magenta - transgene *mpeg:mCherry*) at the injury site on cardiomyocytes (green - transgene *myl7:GFP*). Injury occurred at 72 hpf, with imaging commencing one hour after injury; note that the effect of laser injury on heart rhythm posed challenges for the synchronization, resulting in some planes and/or timepoints with poor synchronization. Scale bar:  $30\mu\text{m}$ , Timestamps: hours post-injury.

**Supplementary Movie 8: Sustained beating-heart time-lapse imaging of immune cell responses to cardiac injury.** Synchronized time-lapse 3D imaging of neutrophil immune cells migrating to the site of laser-injury in zebrafish heart. Maximum intensity projection of  $z$ -stacks, showing neutrophils (cyan - transgene *mpx:mCherry*) at the injury site on the apex of the ventricle (green - transgene *myl7:GFP*). Injury was induced at 72 hpf, with imaging commencing two hours after injury. Scale bar:  $30\mu\text{m}$ , Timestamps: hours post-injury.

**Supplementary Movie 9: Retrospective gating affects heart function.** We have observed changes in heart function when using retrospective gating protocols to acquire time-lapse datasets. Video shows visible deterioration of ejection fraction, heart rate and rhythm.

**Supplementary Movie 10: Adaptive prospective optical gating substantially reduces bleaching rate in sensitive samples.** When fluorophores are particularly light-sensitive, or labelling is highly specific and therefore sparse (e.g. *myl7:mKate-CAAX* transgenic line), we observe that specimens are easily bleached, even using light sheet fluorescence microscopy. When exposed to light levels required for retrospective gating (using typical parameters reported in the literature), the signal from a specimen labelled with membrane-specific mKate fluorophore is halved after only 3 timepoints, whereas with adaptive prospective optical gating over 150 timepoints are recorded before the signal level drops by the same amount.

**Supplementary Movie 11: 3D time-lapse imaging to track cardiomyocyte proliferation during development.** 24 hour time-lapse (shown here as a Maximum Intensity Projection) of a 72–96 hpf embryo, showing cardiomyocyte nuclei (green - transgene *myl7:h2b-gfp*) and cardiomyocyte membranes (magenta - transgene *myl7:mKate-CAAX*). Nuclei of cardiomyocytes which are about to divide are marked by white arrowheads (open arrowheads for less obvious cell divisions in the posterior wall of the heart). Scale bar: 30  $\mu\text{m}$ .
